# Supplementary material for: Dapsone is an anticatalysis for Alzheimer’s disease exacerbation
Source: Research Square preprint supplement (doi:10.21203/rs.3.rs-1260878/v1), 2022-01-14
Supplement: Supplementary file 2 [file 44ea2484d456f3ca39f045d4.docx]

**Table 2.** **T-test table for** Alzheimer's Disease prevalencs and DDS prescription rates

| Year | T1: DDS(+)/AD(+)total | T2: DDS(+)/AD (-)total | T3: DDS(-)/AD (+)total | T4: DDS(-)/AD(-)total |
| --- | --- | --- | --- | --- |
| 2007 | 0.3014 | 0.4884 | 0.6986 | 0.5116 |
| 2008 | 0.2750 | 0.4984 | 0.7250 | 0.5016 |
| 2009 | 0.2235 | 0.5146 | 0.7765 | 0.4854 |
| 2010 | 0.2336 | 0.4856 | 0.7664 | 0.5144 |
| 2011 | 0.2632 | 0.4876 | 0.7368 | 0.5124 |
| 2012 | 0.2241 | 0.4969 | 0.7759 | 0.5031 |
| 2013 | 0.1650 | 0.4402 | 0.8350 | 0.5598 |
| 2014 | 0.1163 | 0.4216 | 0.8837 | 0.5784 |
| 2015 | 0.0970 | 0.4985 | 0.9030 | 0.5015 |
| 2016 | 0.1146 | 0.5083 | 0.8854 | 0.4917 |
| 2017 | 0.1213 | 0.5543 | 0.8787 | 0.4457 |
| 2018 | 0.1335 | 0.6027 | 0.8665 | 0.3973 |
| 2019 | 0.1211 | 0.7403 | 0.8789 | 0.2597 |
| 2020 | 0.0833 | 0.9646 | 0.9167 | 0.0354 |
| The *f*-ratio value is 77.90945. The *p*-value is < .00001. The result is significant at *p* < .05 | | | | |
|  | | | | |
